# Supplementary material for: A noncanonical response to replication stress protects genome stability through ROS production, in an adaptive manner
Source: PubMed Central journal article supplement (PMC10154342; doi:10.1038/s41418-023-01141-0), 2023-03-03

Fig. 4B

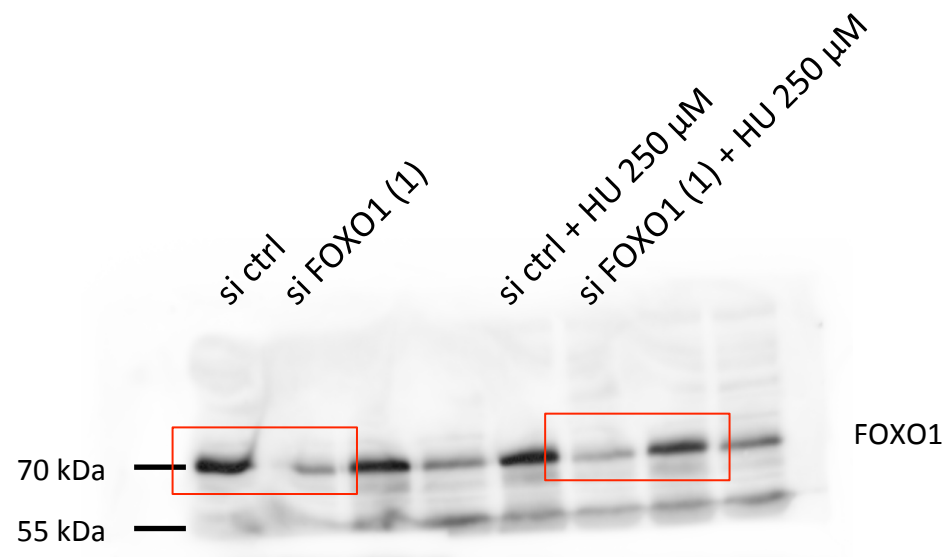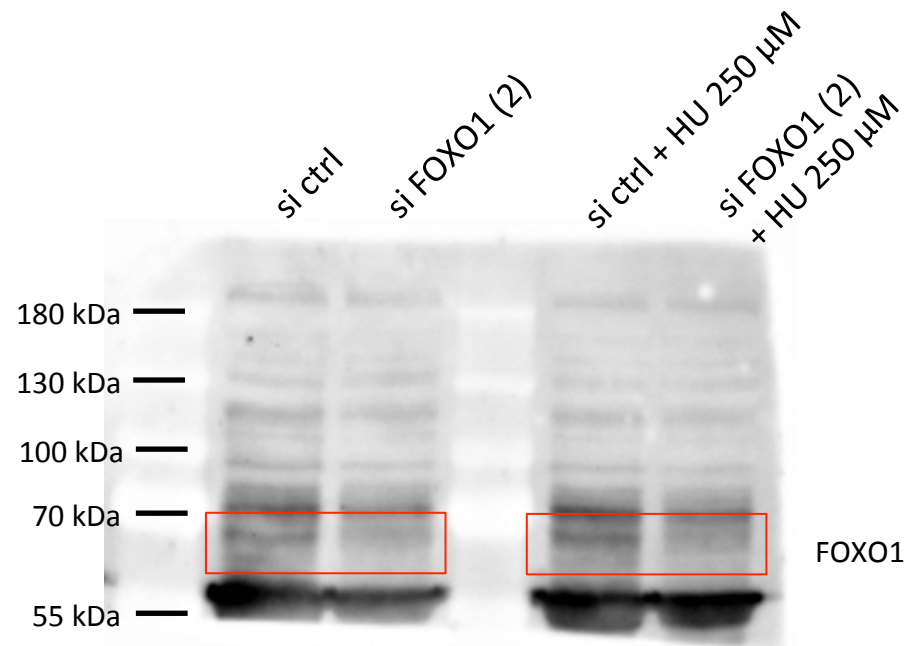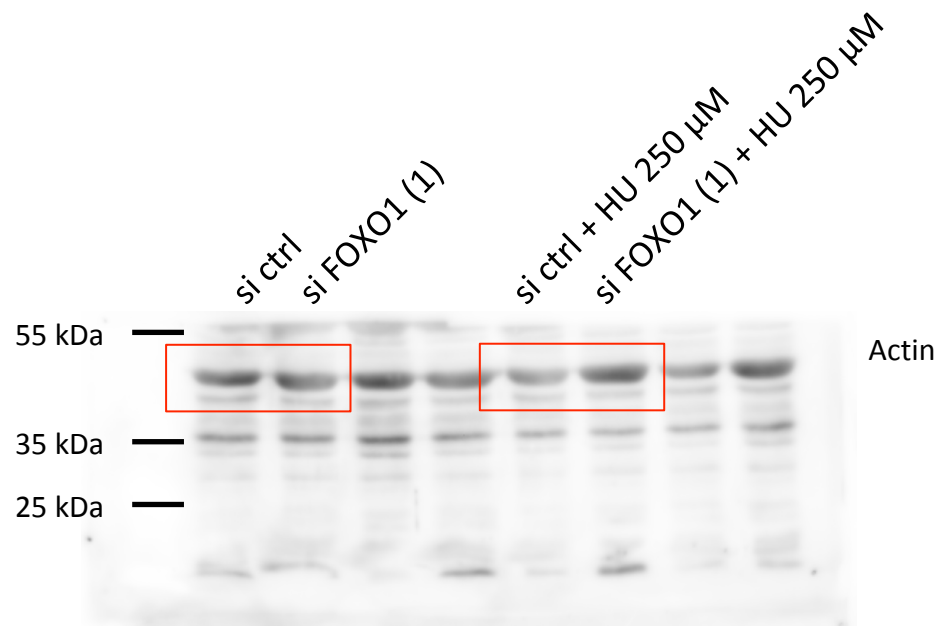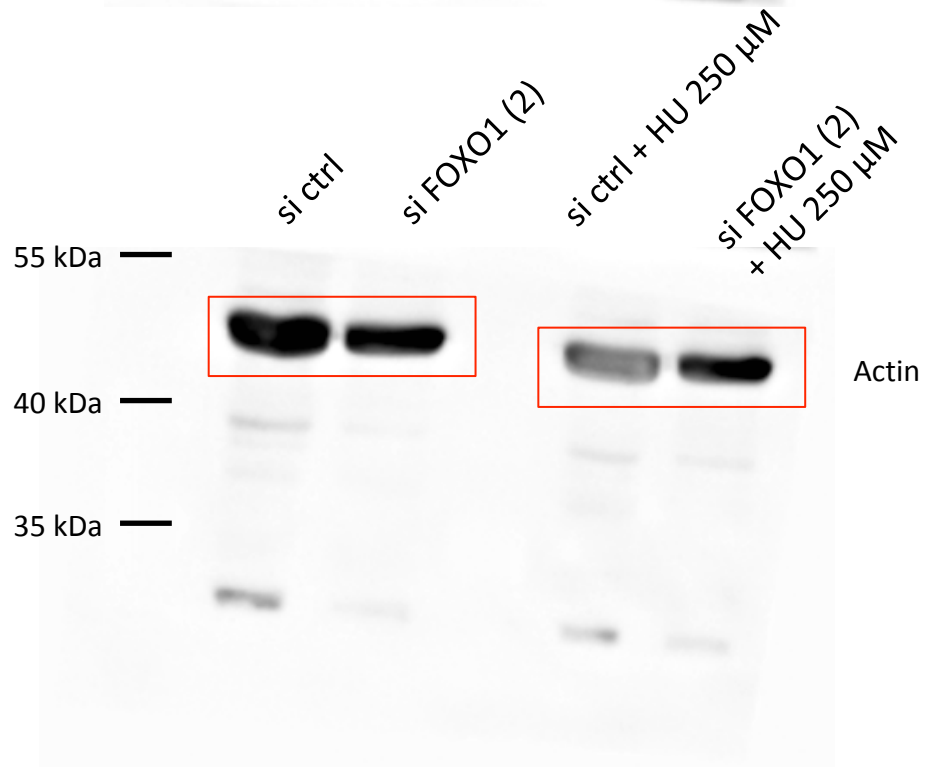

Figure 5

Fig. 5E

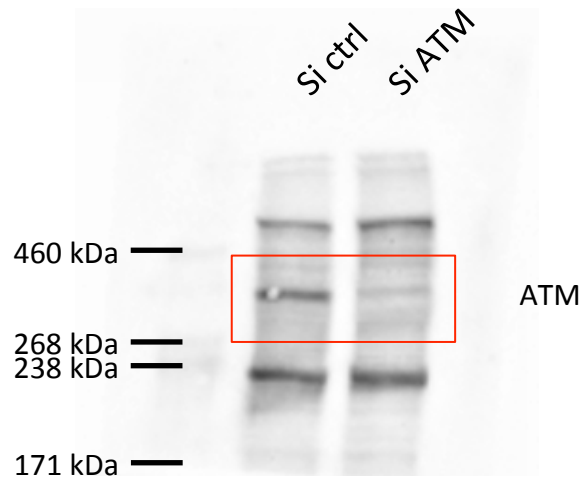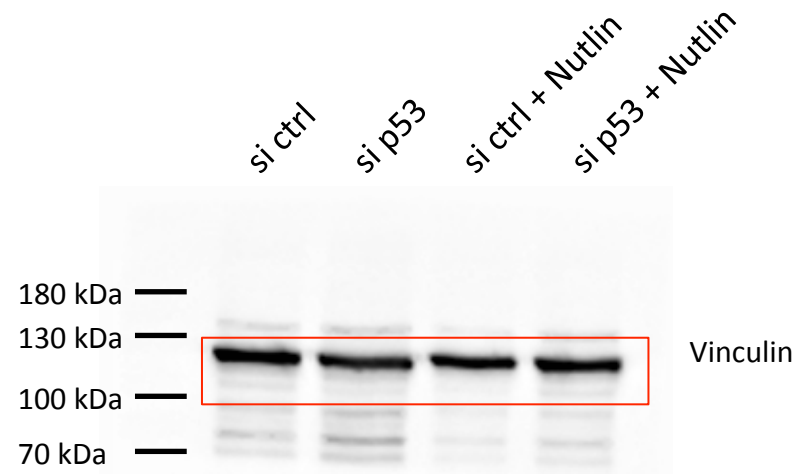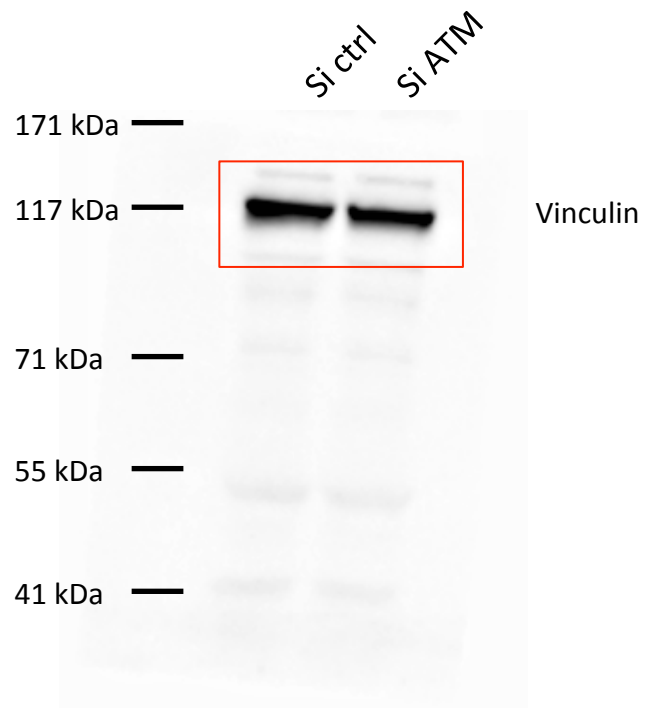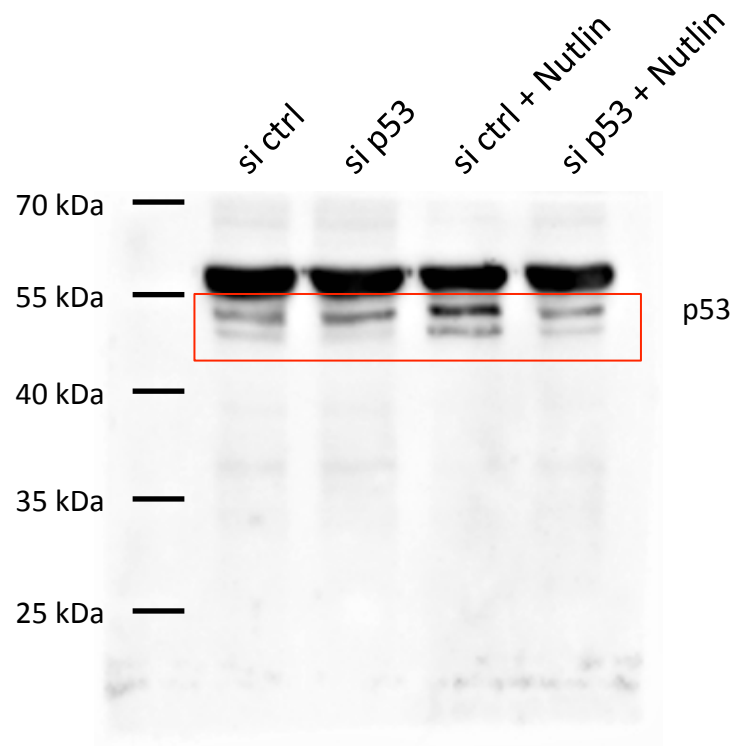

Figure 7

Fig. 7A

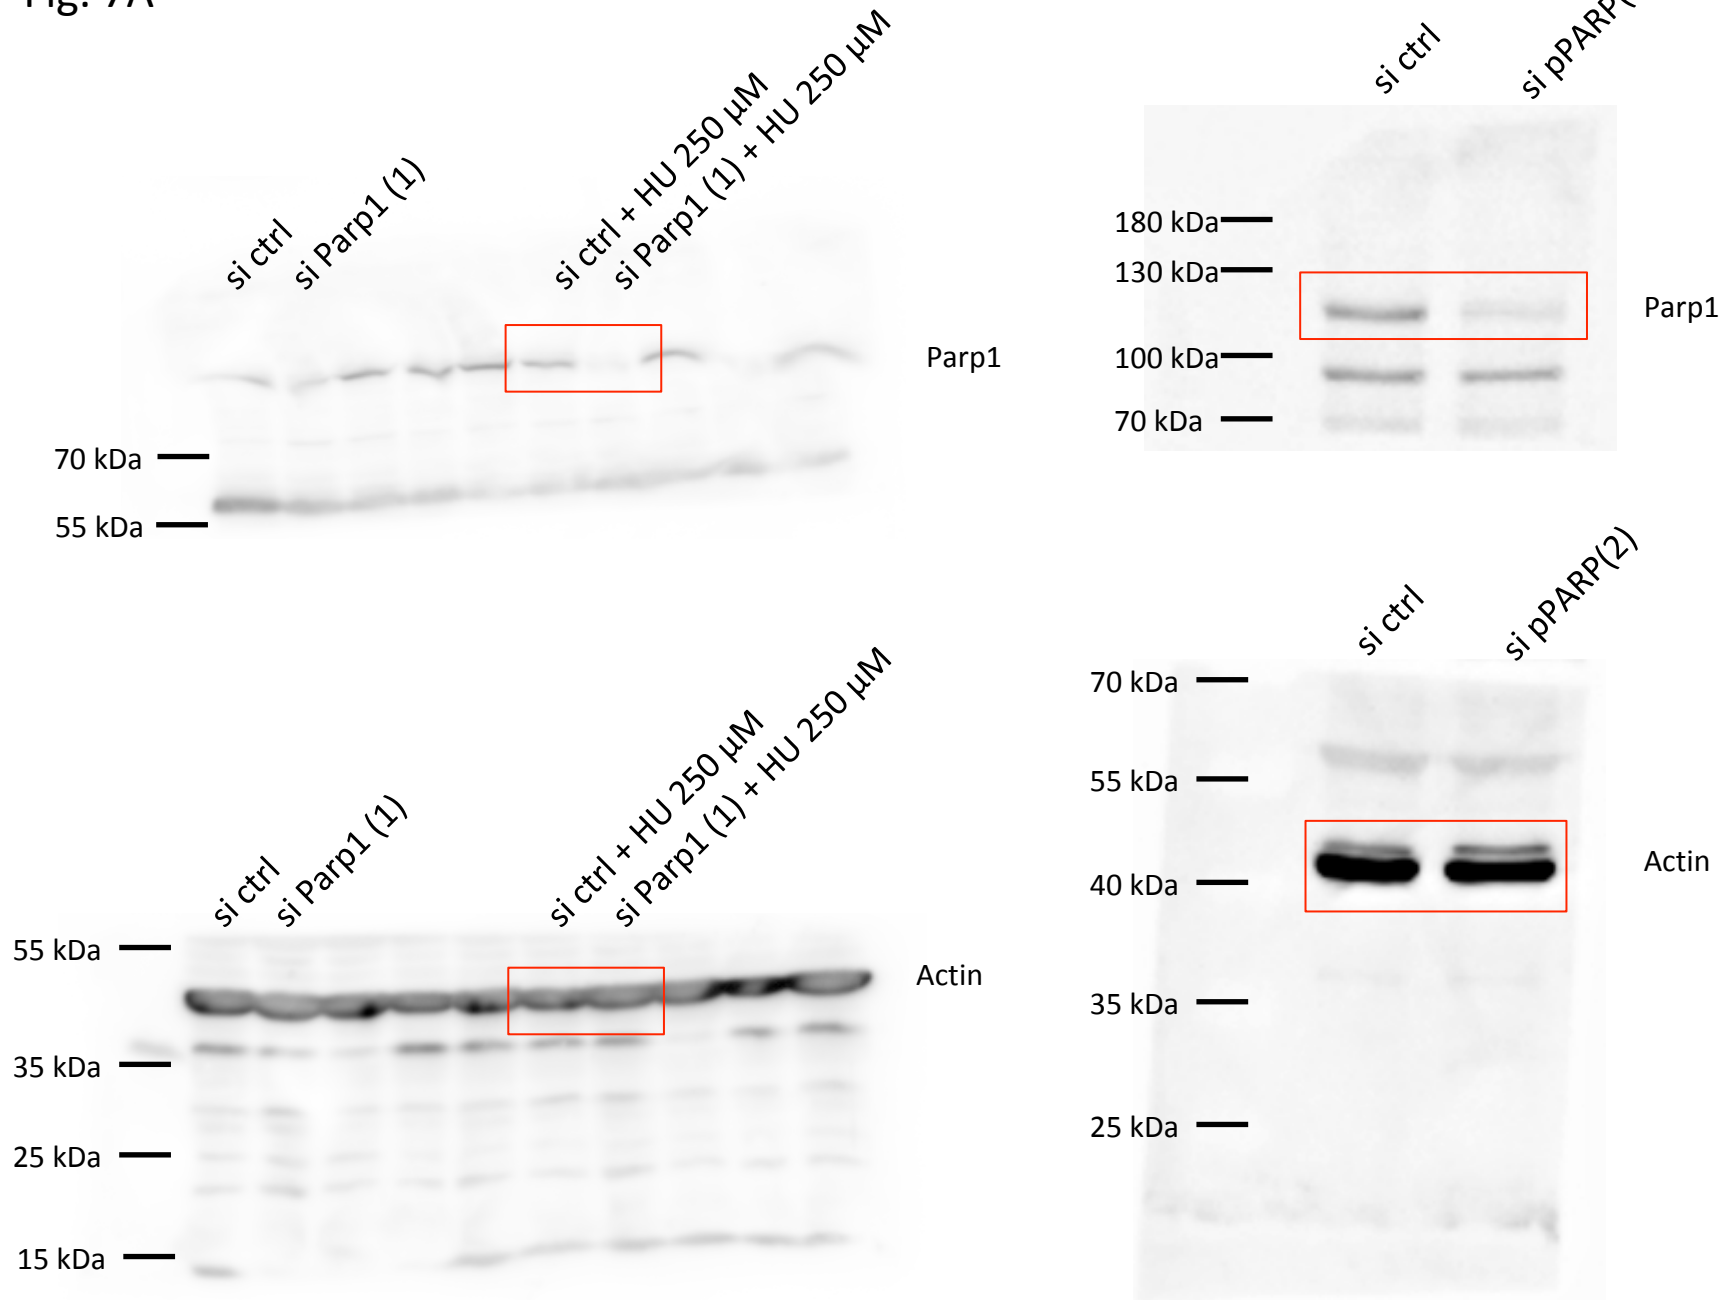

Fig. S7

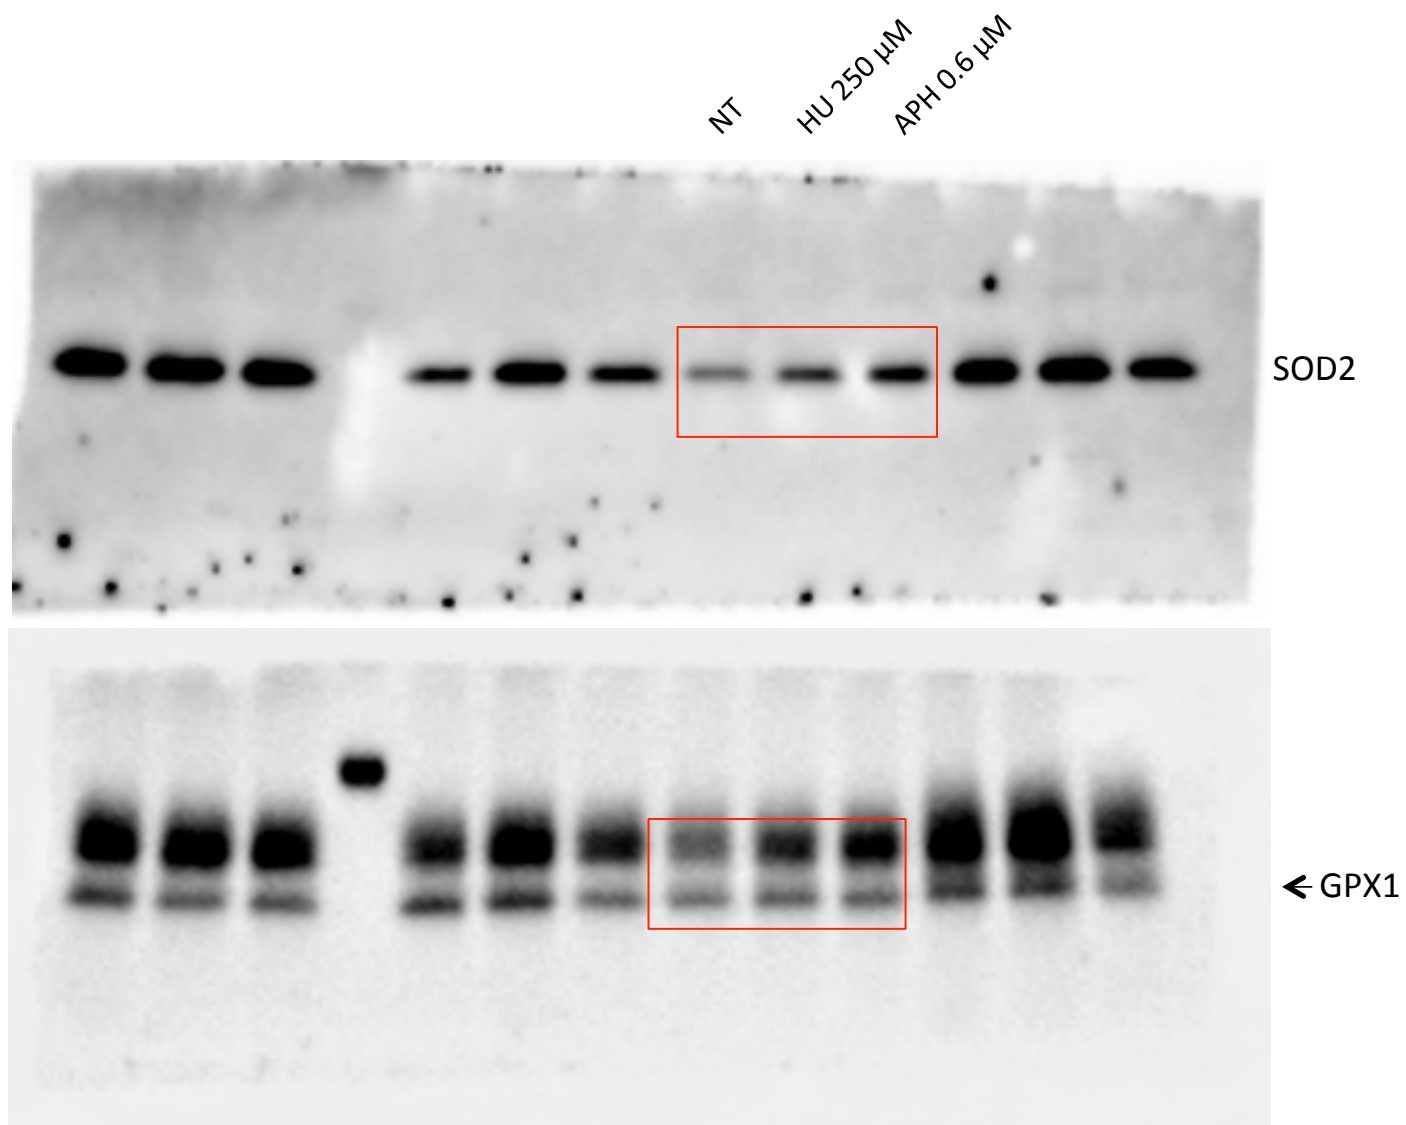

Fig. S7 (suite)

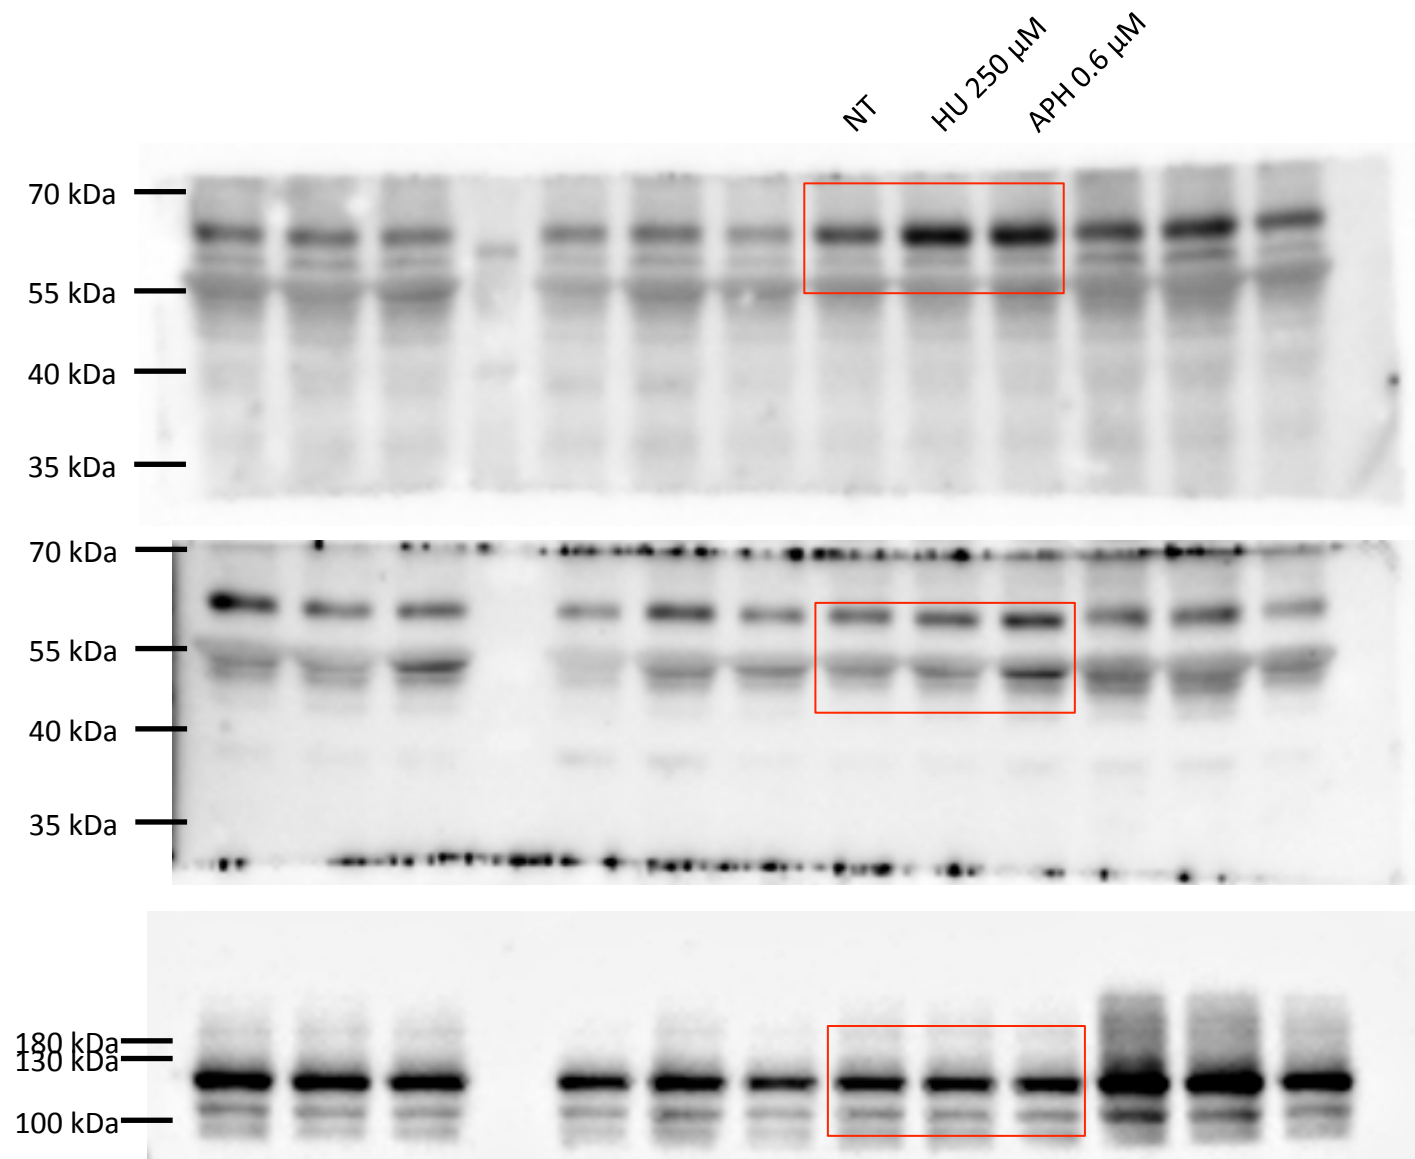

Fig. S12

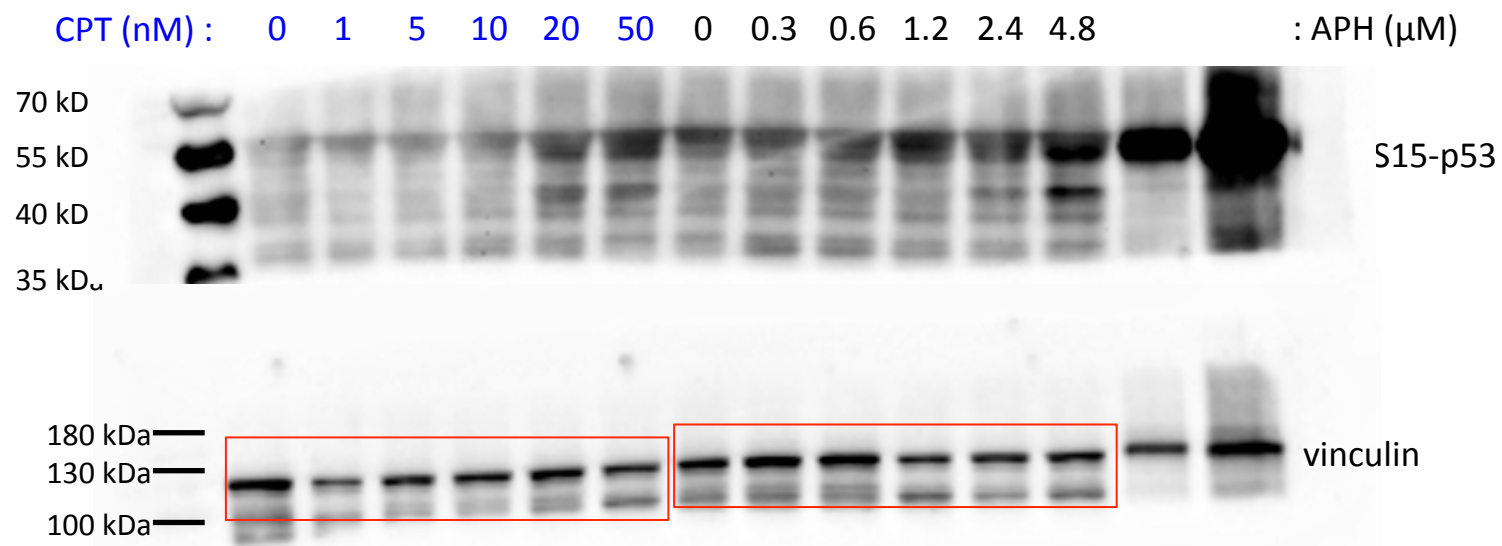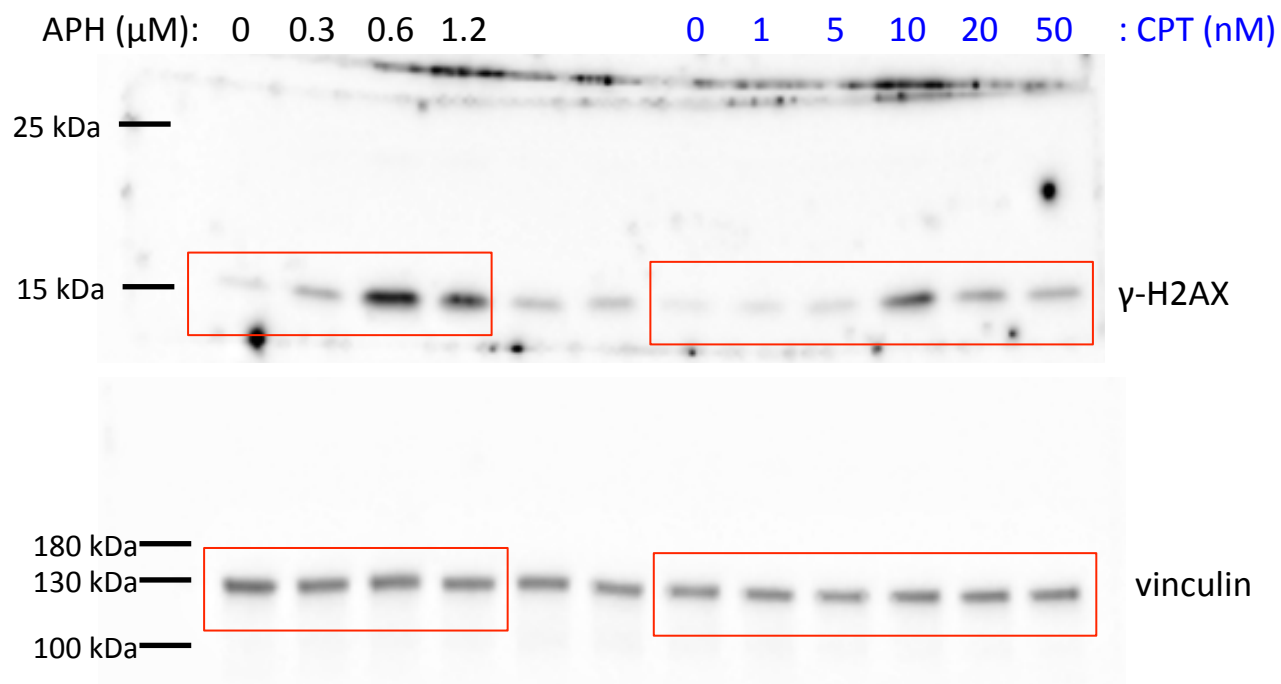

Supplement: 41418_2023_1141_MOESM5_ESM.pdf [file 41418_2023_1141_MOESM5_ESM.pdf]
